# FOCUS

THE JOURNAL OF LIFELONG LEARNING IN PSYCHIATRY

## *Geriatric Psychiatry*

*Guest Editors: Dilip V. Jeste, M.D.  
Helen Lavretsky, M.D., M.S.*

### IN CLINICAL SYNTHESIS:

Successful Aging: Implications for Psychiatry

*Colin A. Depp, Ph.D.*

*A'verria Sirkin Martin, Ph.D.*

*Dilip V. Jeste, M.D.*

The Use of Natural Products and Supplements  
in Late-Life Mood and Cognitive Disorders

*Taya C. Varteresian D.O., M.S.*

*David A. Merrill M.D., Ph.D.*

*Helen Lavretsky M.D., M.S.*

Suicide and Suicide Prevention in Later Life

*Yeates Conwell, M.D.*

The Role of Antipsychotic Drugs in the Treatment  
of Neuropsychiatric Symptoms of Dementia

*Corinna Keenmon, M.D.*

*David Sultzer, M.D.*

AND INFLUENTIAL PUBLICATIONS...
