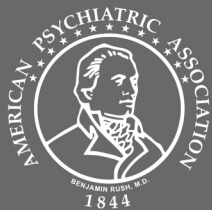

AMERICAN PSYCHIATRIC ASSOCIATION

# 166<sup>TH</sup> ANNUAL MEETING

MAY 18-22, 2013 • SAN FRANCISCO, CA



PURSuing WELLNESS ACROSS THE LIFESPAN

## This is **ONE** APA Annual Meeting **YOU Don't Want to Miss!**

**Discover** – Learn everything you need to know about the new *DSM-5*

**Learn** – Expand your knowledge base with new advances in the field of psychiatry, best practices, and clinical research

**Experts** – Benefit from world-renowned lecturers, including five Nobel Laureates

**Value** – Participate in over 400 clinical and scientific sessions; earn CME; Explore the exhibit hall; Receive special discounts on publications, journals, and CME products – all in one location

**Network** – Expand your peer network and meet new colleagues from around the world

**Registration and housing are now open.**

For more information and to register at the lowest rates available, visit [www.psychiatry.org/annualmeeting](http://www.psychiatry.org/annualmeeting)

*Reserve your housing before preferred rooms are sold out.*

*Call Travel Planners at 800-221-3531 or 212-532-1660.*

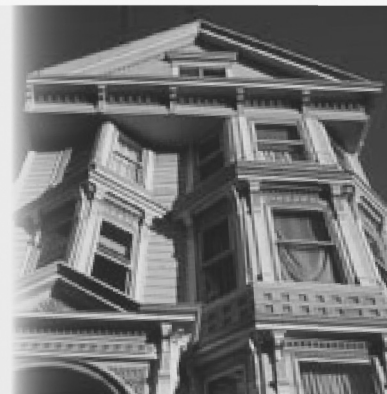

American Psychiatric Association • 1000 Wilson Blvd., Suite 1825 • Arlington, VA 22209-3901

Phone: 703.907.7300 • Toll Free: 888.35.PSYCH / 888.357.7924 • Fax: 703.907.1085 • Email: [apa@psych.org](mailto:apa@psych.org)
